# Supplementary material for: The Pattern of Social Parasitism in Maculinea teleius Butterfly Is Driven by the Size and Spatial Distribution of the Host Ant Nests
Source: MDPI journal article supplement (doi:10.3390/insects14020180), 2023-02-12

**Figure S1.** Observed and expected values (sum across nests with SD) of the  $J_{II}$  statistics (based on empty and infested nests, regardless of parasite species) calculated for autumn at Kraków (a) and Kosyń (b), and for spring (c) at Kraków and (d) at Kosyń.

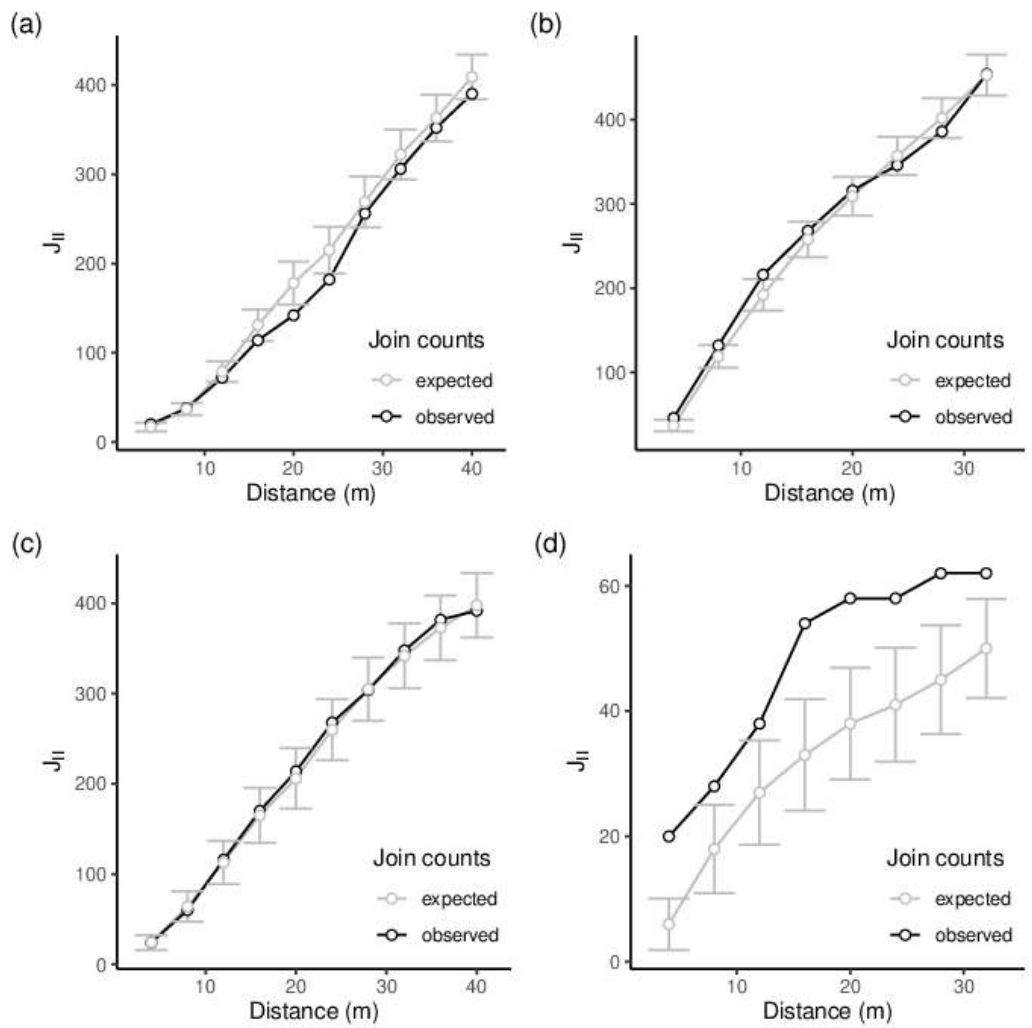

Supplement: s1 [file s1]
