# Supplementary material for: The Pattern of Social Parasitism in Maculinea teleius Butterfly Is Driven by the Size and Spatial Distribution of the Host Ant Nests
Source: MDPI journal article supplement (doi:10.3390/insects14020180), 2023-02-12

**Figure S3.** Observed and expected values (sum) of join count statistics calculated for nests infested by *M. teleius* and/or other parasites for data collected in autumn at a) Kraków and b) Kosyń, and for the spring data set (c) at Kraków and (d) Kosyń. Values are plotted at several spatial distances and standard deviations are reported for the expected values. The  $J_{Mte}$  statistics assess the occurrence of a positive spatial association between *M. teleius* larvae, while the  $J_{Mto}$  statistics assess the likelihood of spatial segregation between *M. teleius* larvae and other parasite species (e.g., for positive spatial association, observed values must be significantly larger than expected).

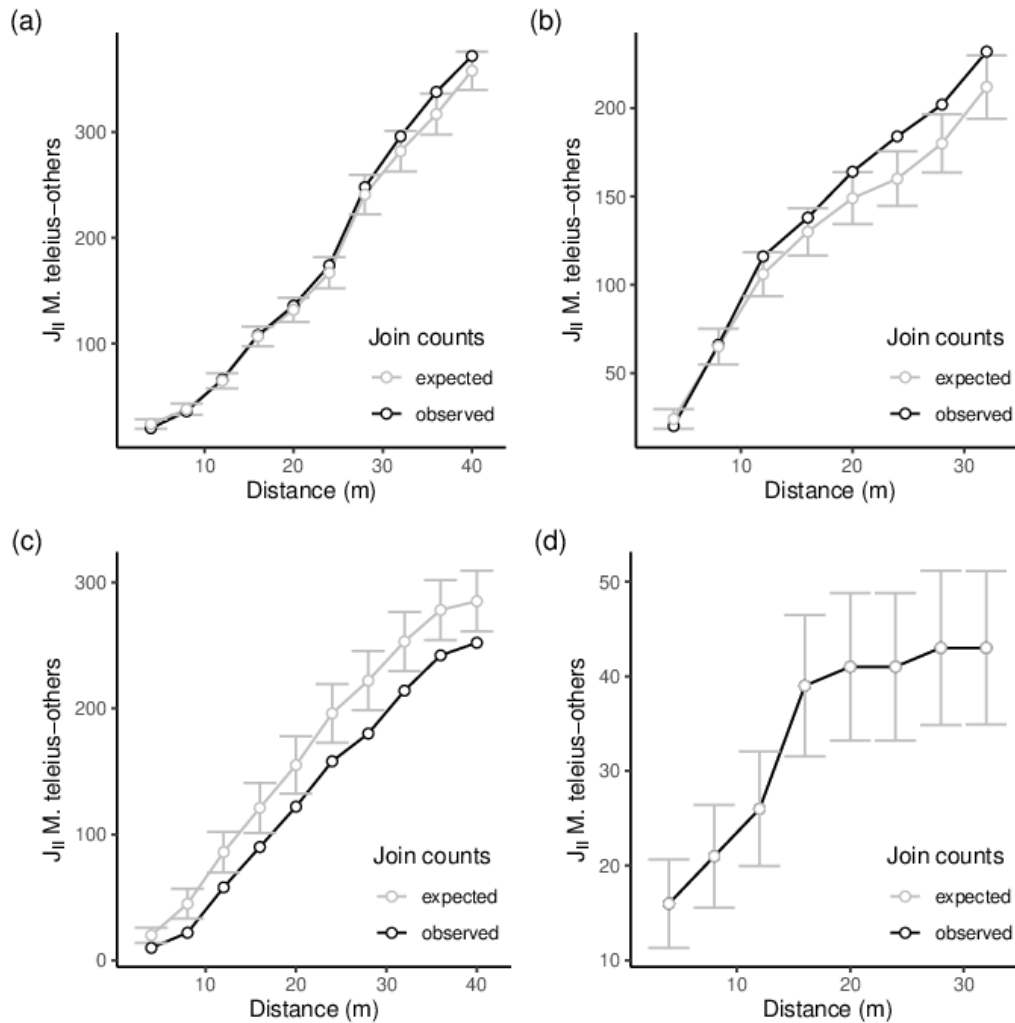

Supplement: s1 [file s1]
