# Supplementary material for: The Pattern of Social Parasitism in Maculinea teleius Butterfly Is Driven by the Size and Spatial Distribution of the Host Ant Nests
Source: MDPI journal article supplement (doi:10.3390/insects14020180), 2023-02-12

**Figure S2.** Observed and expected values (with SD) of join count statistics (sum across nests) calculated for nests infested by *M. teieius*, relative to empty nests. The plots show the  $J_{II}$  values calculated in autumn (a,b) and in late spring (c, d). Plots on the left refer to Kraków (a, c), while those on the right to Kosyń (b, d).

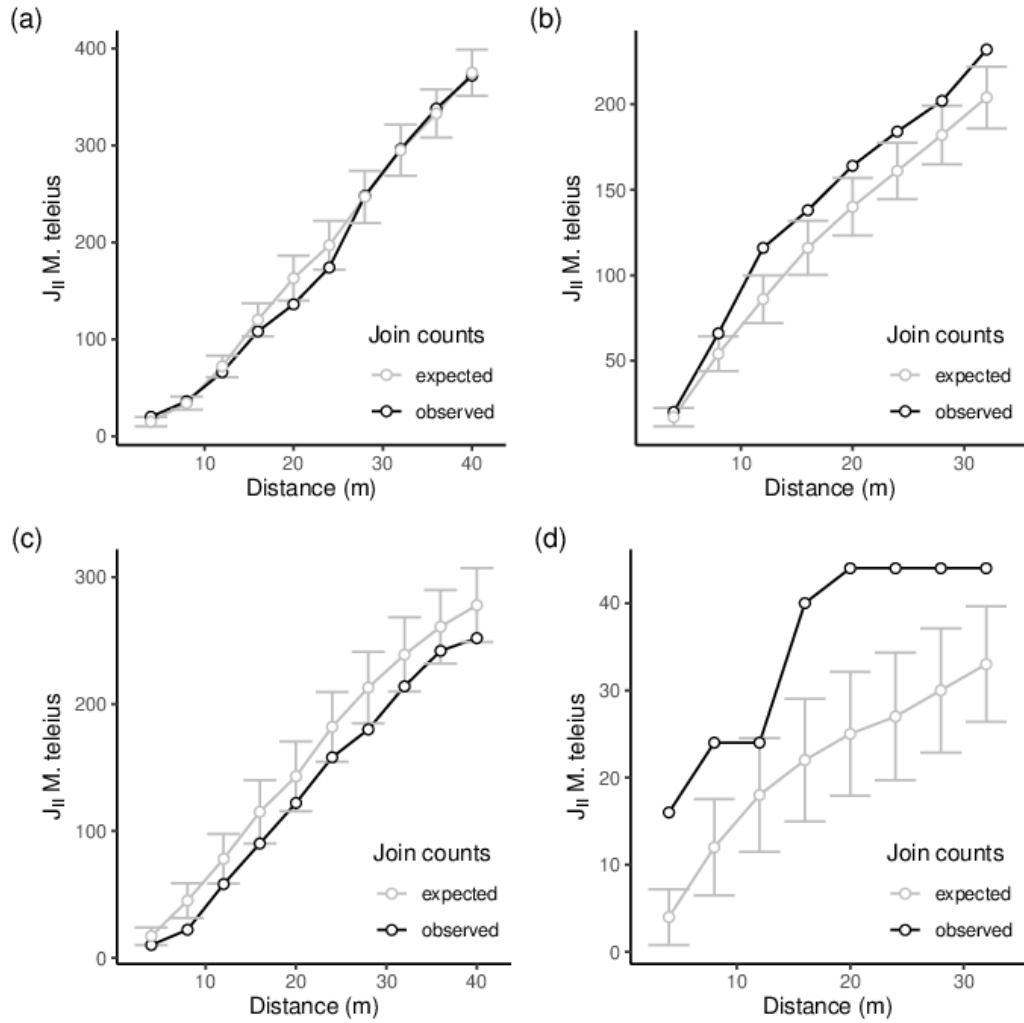

Supplement: s1 [file s1]
